# Supplementary material for: Salivary Biomarkers for Alzheimer’s Disease: A Systematic Review with Meta-Analysis
Source: MDPI journal article supplement (doi:10.3390/ijms25021168), 2024-01-18
Supplement: s1 [file s1]

**Table S1.** The detailed characteristics of included studies.

| Study                          | Inclusion Criteria                                                                                                                                                                                                              | Exclusion Criteria                                                                                                                                                                                 | Smoking Status |
|--------------------------------|---------------------------------------------------------------------------------------------------------------------------------------------------------------------------------------------------------------------------------|----------------------------------------------------------------------------------------------------------------------------------------------------------------------------------------------------|----------------|
| Ahmadi-Motamayel et al., 2019  | AD diagnosis, edentulous                                                                                                                                                                                                        | any other systemic disease, periodontal disease, medications other than neurologic drugs, other dementias, smoking, poor oral hygiene; HC: any cognitive symptoms, any sign or symptom of dementia | non-smokers    |
| Ashton et al., 2018            | AD: diagnosis of probable AD according to Diagnostic and Statistical Manual for Mental Diagnosis                                                                                                                                | NR                                                                                                                                                                                                 | NR             |
| Bakhtiari et al., 2017         | AD: AD diagnosis, on memantine therapy                                                                                                                                                                                          | HC: neurological or cognitive disease                                                                                                                                                              | NR             |
| Bermejo-Pareja et al., 2010    | AD: AD diagnosis according to the DSM-IV or NINCDS-ADRDA criteria; HC: completely normal cognitive and functional level; PD: PD diagnosis according to appropriate criteria                                                     | AD: vascular dementia                                                                                                                                                                              | NR             |
| Boschi et al., 2022            | AD: AD diagnosis based on the NIA-AA criteria, A-T-N classification scheme; non-AD: normal biomarker profile, evidence of non-Alzheimer’s pathologic change                                                                     | HC: dementia or cognitive impairment                                                                                                                                                               | NR             |
| Carro et al., 2017             | HC: CDR scale = 0, MMSE score = 29 (0.8), normal yields in cognitive tests of memory, language, executive functions, AD: AD diagnosis according to the NINCDS-ADRDA criteria; MCI: MCI diagnosis based on the Petersen criteria | HC: psychiatric, systemic or neurological disorders that can affect cognition or limit participation in the study, visual, auditory, language limitations                                          | NR             |
| Contini et al., 2023           | AD: AD diagnosis according to the NIA-AA criteria                                                                                                                                                                               | major oral disease (periodontitis, caries, dry mouth), history of radiotherapy or chemotherapy, antidepressants or anticholinergic drugs                                                           | NR             |
| Cui et al., 2022               | AD: AD diagnosis according to the CCMD-3 and Diagnostic and Statistics Manual of Mental Illness criteria; HC: normal cognitive function; age more than or equal to 60 years in both groups                                      | AD: severe organ dysfunction, having taken antipsychotic drugs a month before; HC: mental disorder, hereditary neurological disease among immediate family members, history of head trauma         | NR             |
| De Souza-Talarico et al., 2008 | AD: fulfillment of the NINCDS-ADRDA criteria for probable AD, mild dementia according to the DSM-III-r criteria                                                                                                                 | HC: other neurological or psychiatric disease, cognitive alterations incompatible with the norm for age, history of alcohol or drug abuse, using psychoactive medication, illiterate individuals   | NR             |
| Dos Santos et al., 2020        | AD: probable AD diagnosis, all stages of disease                                                                                                                                                                                | signs of mouth injury at the time of saliva collection                                                                                                                                             | NR             |

Nijakowski et al. „Salivary biomarkers for Alzheimer’s Disease: a systematic review with meta-analysis” – Supplementary materials

|                               |                                                                                                                                                                                                                                                                                                    |                                                                                                                                                                                                                                  |                                                        |
|-------------------------------|----------------------------------------------------------------------------------------------------------------------------------------------------------------------------------------------------------------------------------------------------------------------------------------------------|----------------------------------------------------------------------------------------------------------------------------------------------------------------------------------------------------------------------------------|--------------------------------------------------------|
| Eldem et al., 2022            | AD, MCI: diagnosis based on recommendations of Swiss memory clinics for the diagnosis of dementia; categorization of participants according to CDR, MMSE, UPSIT scales                                                                                                                             | NR                                                                                                                                                                                                                               | NR                                                     |
| François et al., 2021         | AD: AD diagnosis according to the NINCDS-ADRDA, NIA-AA criteria; MCI: MCI diagnosis according to the NINCDS-ADRDA, NIA-AA criteria                                                                                                                                                                 | significant cognitive comorbidities including head trauma, learning disability, alcoholism, PD, chemotherapy/radiotherapy treatment for cancer, taking micronutrient supplements (folate, vitamin B12) above recommended intakes | NR                                                     |
| Gleerup et al., 2021          | AD: AD diagnosis according to the NIA-AA criteria; MCI: MCI diagnosis according to the International Working Group in Mild Cognitive Impairment criteria, non-AD patients diagnosed according to appropriate criteria, HC: no fulfillment of above mentioned criteria                              | NR                                                                                                                                                                                                                               | NR                                                     |
| González-Sánchez et al., 2020 | controls: age over 60, MMSE score over 27, no history or clinical signs of neurological or psychiatric disease, preservation of social and functional abilities; patients: diagnosis according to appropriate criteria                                                                             | concomitant psychiatric, neurological or non-neurological medical conditions, medications that could affect cognition                                                                                                            | NR                                                     |
| Huan et al., 2018             | MCI and HC: two waves (4.5 years) of longitudinal data, complete data on the Victoria Longitudinal Study cognitive status reference battery, minimum MMSE = 24; AD: AD diagnosis based on the DSM-IV criteria                                                                                      | MCI and HC: diagnosed dementia, cardiovascular disease, stroke history, or psychiatric illness; AD: vascular dementia                                                                                                            | NR                                                     |
| Katsipis et al., 2021         | AD: AD diagnosis according to the NIA-AA criteria; MCI: MCI diagnosis based on the Petersen criteria, HC: no neurological disease                                                                                                                                                                  | abnormal levels of vitamin B9 or B12, and thyroid-stimulating hormone (TSH), dementia due to syphilis, stroke tumor, autoimmune disorders, chronic inflammatory diseases, active periodontal lesions, periodontitis              | NR                                                     |
| Lau et al., 2015              | HC: at least 50 years of age, good general health, no history of neurological, psychiatric or major medical diagnosis that could contribute significantly to dementia or cognitive impairment; series of clinical and neuropsychological examinations by physicians and neuropsychologists defined | NR                                                                                                                                                                                                                               | AD: 3 smokers, 1 ex-smoker; HC: 3 smokers, 1 ex-smoker |

Nijakowski et al. „Salivary biomarkers for Alzheimer’s Disease: a systematic review with meta-analysis” – Supplementary materials

|                            | participants' inclusion to appropriate groups                                                                                                                                                                                                                                                                                         |                                                                                                                                                                                                                                                                                                              |    |
|----------------------------|---------------------------------------------------------------------------------------------------------------------------------------------------------------------------------------------------------------------------------------------------------------------------------------------------------------------------------------|--------------------------------------------------------------------------------------------------------------------------------------------------------------------------------------------------------------------------------------------------------------------------------------------------------------|----|
| Liang et al., 2015         | AD: AD diagnosis based on the NINCDS-ADRDA criteria                                                                                                                                                                                                                                                                                   | HC: neurologic or cognitive disease                                                                                                                                                                                                                                                                          | NR |
| Marksteiner et al., 2022   | AD: AD diagnosis based on the NINCDS-ADRDA criteria; MCI: MCI diagnosis according to the Petersen criteria; patients' diagnosis according to the previous work                                                                                                                                                                        | another primary neurological or mental disorder, any kind of metabolic decompensation, any sign of peripheral inflammation, longterm alcohol, drug abuse, any current, clinically significant cardiovascular disease, current intake of medication that could impact saliva production or saliva composition | NR |
| Marksteiner et al., 2019   | AD: AD diagnosis; MCI: MCI diagnosis; patients' diagnosis confirmed by neurologist, psychiatrist, and neuropsychologist, patients' diagnosis according to the previous study                                                                                                                                                          | other psychiatric or neurological diseases, cancer, vascular diseases, diseases with clinically significant hepatic, pulmonary, renal, metabolic, or endocrine disturbances, inflammation, significant small vessel cerebrovascular disease, large vessel strokes                                            | NR |
| McNicholas et al., 2022    | all: aged over 55 years; AD: AD diagnosis based on the NIA-AA criteria; MCI: MCI diagnosis based on the NIA-AA criteria; as described by François et al., 2021                                                                                                                                                                        | cognitive co-morbidities including PD, head trauma, learning disability, alcoholism                                                                                                                                                                                                                          | NR |
| Pekes et al., 2019         | HC: aged at least 60 years, MoCA score at least 25; AD: AD diagnosis based on the NIA-AA criteria, MCI: subjective memory complaints, normal activities of daily living and general cognitive function, objective evidence of memory impairment on testing, not demented; other disorders diagnosed according to appropriate criteria | “mixed” pathology, mixed AD/PD diagnosis                                                                                                                                                                                                                                                                     | NR |
| Peña-Bautista et al., 2019 | age 50-75 years old, AD group: positive biomarkers (neuroimaging, CSF $\beta$ -amyloid, CSF tau); other participants: negative biomarkers; AD diagnosis according to the NIA-AA criteria                                                                                                                                              | participants with ambiguous findings                                                                                                                                                                                                                                                                         | NR |
| Peña-Bautista et al., 2020 | AD group: altered neuropsychological evaluation (CDR > 0, RBANS.DM< 65, MMSE< 27), positive CSF biomarkers, MCI-AD: cognitive complaints without daily living activities impairment, mild AD: minor daily living activities impairment, examination according to the NIA-AA criteria                                                  | history of structural brain disease (tumour, stroke, etc.), epilepsy, major head trauma, multiple sclerosis, major psychiatric disorders, inability to undergo neuropsychological evaluations                                                                                                                | NR |

Nijakowski et al. „Salivary biomarkers for Alzheimer’s Disease: a systematic review with meta-analysis” – Supplementary materials

|                               |                                                                                                                                                                                                                              |                                                                                                                                                                                                                                                                                                                                                                                                                                  |             |
|-------------------------------|------------------------------------------------------------------------------------------------------------------------------------------------------------------------------------------------------------------------------|----------------------------------------------------------------------------------------------------------------------------------------------------------------------------------------------------------------------------------------------------------------------------------------------------------------------------------------------------------------------------------------------------------------------------------|-------------|
| Pukhalskaia et al., 2020      | HC: clinical, laboratory, and instrumental examination according to the age norm; AD: mild or moderate AD stage according to the NINCDS-ADRDA or ICD-10 criteria                                                             | HC: exacerbation of neural, cardiovascular, respiratory, and endocrine system diseases                                                                                                                                                                                                                                                                                                                                           | NR          |
| Ryu et al., 2023              | AD: AD diagnosis based on the NINCDS-ADRDA criteria, MMSE score, PET examination, HC: not meeting these criteria                                                                                                             | NR                                                                                                                                                                                                                                                                                                                                                                                                                               | NR          |
| Sabaei et al., 2023           | HC: MMSE score equal to or more than 26, no history of neurological diseases; AD: AD diagnosis according to the NIA-AA criteria, no other diseases that affect cognition; PD: PD diagnosis according to appropriate criteria | AD, PD: drugs other than medications for treating the underlying neurological disease; all participants: history of vascular dementia, head injury, stroke, liver or kidney failure, other dementias                                                                                                                                                                                                                             | NR          |
| Shi et al., 2011              | HC: MMSE score equal to or more than 27, paragraph recall scores >6; AD: AD diagnosis according to the NINCDS-ADRDA criteria                                                                                                 | HC: history of neurological disease, evidence of cognitive or functional decline                                                                                                                                                                                                                                                                                                                                                 | NR          |
| Tvarijonaviciute et al., 2020 | aged 65 years or older; AD: confirmed diagnosis of AD dementia; HC: functionally and socially active, MMSE score equal to or more than 28                                                                                    | All: chemotherapy, radiotherapy of the head and neck, serious personality disorders, schizophrenia, epilepsy, drug abuse, meningioma other brain tumor, chronic treatment with cyclosporine or other immunosuppressor, uncontrolled acute or chronic disease; HC: dementia, cognitive impairment, neurodegenerative disease                                                                                                      | NR          |
| Zalewska et al., 2021         | AD: AD diagnosis according to the NINCDS-ADRDA criteria; HC: no neurological diseases or cognitive impairment, attending dental check-ups, matching to the study group in terms of gender and age                            | history of hemorrhagic, ischemic stroke, traumas within the cerebral part of the skull, severe depression, vascular dementia, tumors within the brain, diabetes, insulin resistance, thyroid diseases, obesity, psoriasis, PD, Huntington’s disease, deficiency of vitamin B12 or folic acid, abuse of smoke cigarettes or alcohol, antibiotics or supplements during the 6 months preceding material collection, change of diet | non-smokers |

Legend: AD, Alzheimer’s Disease; A-T-N, Amyloid, Tau, and Neurodegeneration classification; CCMD-3, Chinese Classification of Mental Disorders, Third Edition; CDR, Clinical Dementia Rating; CSF, cerebrospinal fluid; DM scale, Dementia-Metabolic; DSM-III-r, Diagnostic and Statistical Manual of Mental Disorders, Third Edition, revised; DSM-IV, Diagnostic and Statistical Manual of Mental Disorders, Fourth Edition; HC, healthy controls; ICD-10, International Classification of Diseases; MCI, Mild Cognitive Impairment; MMSE score, Mini-Mental State Examination; MoCA score, Montreal Cognitive Assessment; NIA-AA criteria, National Institute on Aging and Alzheimer’s Association; NINCDS-ADRDA criteria, National Institute of Neurological and Communicative Disorders and Stroke and the Alzheimer’s Disease and Related Disorders Association criteria; NR, not reported; PD, Parkinson’s Disease; PET, Positron Emission Tomography; RBANS scale, Repeatable Battery for the Assessment of Neuropsychological Status; UPSIT, University of Pennsylvania Smell Identification Test.
